1 Mutation analysis of multiple pilomatricomas in a patient with myotonic  
2 dystrophy type 1 suggests a DM1-associated hypermutation phenotype

3

4 Albert Rübben<sup>1\*</sup>, Renate Ursula Wahl<sup>1</sup>, Thomas Eggermann<sup>2</sup>, Edgar Dahl<sup>3,4</sup>, Nadina  
5 Ortiz-Brüchle<sup>3,4¶</sup>, Claudio Cacchi<sup>3¶</sup>

6

7 <sup>1</sup> Department of Dermatology, RWTH Aachen University, Aachen, Germany.

8 <sup>2</sup> Institute of Human Genetics, RWTH Aachen University, Aachen, Germany.

9 <sup>3</sup> Institute of Pathology, RWTH Aachen University, Aachen, Germany.

10 <sup>4</sup> RWTH centralized Biomaterial Bank (RWTH cBMB), Medical Faculty, Aachen,  
11 Germany.

12

13 \* Corresponding author.

14 E-mail: [albert\\_ruebben@post.rwth-aachen.de](mailto:albert_ruebben@post.rwth-aachen.de) (AR)

15

16

17 ¶ N.O.-B. and C.C. are Joint Senior Authors.

18

19 **Abstract**

20 Myotonic dystrophy type 1 (DM1) is an inherited neuromuscular disease which results from an  
21 expansion of repetitive DNA elements within the 3' untranslated region of the *DMPK* gene. Some  
22 patients develop multiple pilomatricomas as well as malignant tumors in other tissues. Mutations of the  
23 catenin- $\beta$  gene (*CTNNB1*) could be demonstrated in most non-syndromic pilomatricomas.

24 In order to gain insight into the molecular mechanisms which might be responsible for the occurrence  
25 of multiple pilomatricomas and cancers in patients with DM1, we have sequenced the *CTNNB1* gene  
26 of four pilomatricomas and of one pilomatricoma which developed in one patient with

27 molecularly proven DM1 within 4 years. We further analyzed the pilomatrical tumors for microsatellite  
28 instability as well as by NGS for mutations in 161 cancer-associated genes.

29 Somatic and independent point-mutations were detected at typical hotspot regions of *CTNNB1* (S33C,  
30 S33F, G34V, T41I) while one mutation within *CTNNB1* represented a duplication mutation (G34dup.).  
31 Pilomatricoma samples were analyzed for microsatellite instability and expression of mismatch repair  
32 proteins but no mutated microsatellites could be detected and expression of mismatch repair proteins  
33 MLH1, MSH2, MSH6, PMS2 was not perturbed. NGS analysis only revealed one heterozygous  
34 germline mutation c.8494C>T; p.(Arg2832Cys) within the ataxia telangiectasia mutated gene (*ATM*)  
35 which remained heterozygous in the pilomatrical tumors.

36 The detection of different somatic mutations in different pilomatricomas and in the pilomatrical  
37 carcinoma as well as the observation that the patient developed multiple pilomatricomas and one  
38 pilomatrical carcinoma over a short time period strongly suggest that the patient displays a  
39 hypermutation phenotype. This hypermutability seems to be tissue and gene restricted. Co-translation  
40 of the mutated *DMPK* gene and the *CTNNB1* gene in cycling hair follicles might constitute an  
41 explanation for the observed tissue and gene specificity of hypermutability observed in DM1 patients.  
42 Elucidation of putative mechanisms responsible for hypermutability in DM1 patients requires further  
43 research.

44

45

## 46 **Author summary**

47 Less than 10% of patients with myotonic dystrophy type 1 (DM1), an inherited and the most common  
48 neuromuscular disorder, develop pilomatricomas, often as multiple tumors. Pilomatricomas are benign  
49 skin tumors deriving from hair matrix cells, and they are very rare in the general population. Recently it  
50 could be demonstrated that DM1 patients also harbour an enhanced risk for benign and malignant  
51 tumors in various other tissues.

52 DM1 is characterized genetically by an expansion of trinucleotide repeats within the 3' untranslated  
53 region of the *DMPK* gene (DM1 protein kinase). It could be demonstrated that these expanded CTG-

54 repeats are transcribed into RNA and that this non-translated repetitive RNA forms aggregates with  
55 various splicing regulators, which in turn impair transcription of multiple genes in various tissues.  
56 Following the gain-of-function-RNA hypothesis, Mueller and colleagues suggested in 2009 that the  
57 untranslated repetitive RNA directly enhances expression of  $\beta$ -catenin resulting in pilomatricomas as  
58 well as in various cancers which rely on activation of the WNT/APC/ $\beta$ -catenin pathway.

59 In order to prove or to reject this hypothesis we have sequenced the *CTNNB1* gene of four  
60 pilomatricomas and of one pilomatrical carcinoma which developed in one patient with molecularly  
61 proven DM1 within 4 years. Somatic and independent point-mutations were detected at typical hotspot  
62 regions of *CTNNB1* (S33C, S33F, G34V, T41I) while one mutation within *CTNNB1* represented a  
63 duplication mutation (G34dup.). We further analyzed the pilomatrical tumors for microsatellite  
64 instability but no mutated microsatellites could be detected and expression of mismatch repair proteins  
65 MLH1, MSH2, MSH6, PMS2 was not perturbed. NGS analysis in 161 cancer-associated genes only  
66 revealed one heterozygous germline mutation c.8494C>T; p.(Arg2832Cys) within the ataxia  
67 telangiectasia mutated gene (*ATM*) which remained heterozygous in the pilomatrical tumors.

68 The detection of different somatic mutations in different pilomatricomas and in the pilomatrical  
69 carcinoma does not support the hypothesis that untranslated repetitive RNA directly enhances  
70 expression of  $\beta$ -catenin resulting in pilomatricomas. In contrast, our results strongly suggest that the  
71 patient displays a tissue and gene restricted hypermutation phenotype. One putative mechanism for  
72 the assumed gene and tissue restriction could be co-translation of the mutated *DMPK* gene and the  
73 *CTNNB1* gene in cycling hair follicles.

74

## 75 **Introduction**

76 Myotonic dystrophy type 1 (DM1, OMIM 160900) is an inherited and the most common neuromuscular  
77 disorder characterized genetically by an expansion of trinucleotide repeats within the 3' untranslated  
78 region of the *DMPK* (DM1 protein kinase) gene [1-5]. The DNA-expansion within the *DMPK* gene is  
79 considered causative for the observed muscle weakness and cardiac disease [5,6]. Besides, affected  
80 patients develop early cataract as well as insulin resistance and cognitive impairment.

81 Although initially hypothesized that DM1 is primarily caused by mutations that generate an  
82 amplification of CTG repeats [1], the underlying mutation driving this amplification has not been  
83 identified yet. It has, nevertheless, been speculated that the DNA mismatch-repair mechanism as well  
84 as mechanisms involved in the resolution of secondary DNA structures such as hairpins or R-loops  
85 might be implicated in some form [7-9]. In order to explain the multiple non-muscular clinical symptoms  
86 which are associated with DM1, an alternative gain-of-function-RNA hypothesis was formulated and  
87 subsequently proven. It could be demonstrated that expanded CTG-repeats within the *DMPK* gene are  
88 transcribed into RNA and that this non-translated repetitive RNA then forms aggregates with various  
89 splicing regulators, which in turn impair transcription of multiple genes in various tissues and which  
90 might also be responsible for further expansion of CTG-repeats [5,10-12].

91 For more than 50 years it has been known that patients with myotonic dystrophy may develop multiple  
92 pilomatricomas (synonyms: pilomatrixoma, calcifying epithelioma of Malherbe) which are benign  
93 calcifying skin tumors deriving from hair matrix cells [13-15]. Pilomatricoma is a relatively rare tumor  
94 but it represents the second most frequent skin tumor in childhood. Age distribution seems to follow a  
95 bimodal distribution with a first marked peak in the first decennium and a second small and broad  
96 increase in prevalence between 41- and 71-years of age. Non-syndromic pilomatricoma occurs mostly  
97 as a solitary lesion in the head and neck region. While the scalp is affected in childhood in only  
98 approx. 4%, pilomatricomas of the scalp are more frequent in adulthood (approx. 27%) [16-18],  
99 whereas in myotonic dystrophy, most pilomatricomas are located on the scalp [15]. In contrast to non-  
100 syndromic pilomatricoma, myotonic dystrophy-associated pilomatricoma is a disease of adulthood.  
101 The overall frequency of pilomatricoma in DM1 seems to be lower than 10% with a male  
102 predominance [19-22].

103 Multiple pilomatricomas have also been encountered in patients with Turner syndrome, Rubinstein-  
104 Taybi syndrome, trisomy 9, Gardner syndrome and in patients with constitutive mismatch repair  
105 deficiency (CMMR-D) [23]. A family with non-syndromic multiple pilomatricomas has been described  
106 as well [24]. Mutations of the catenin- $\beta$  gene (*CTNNB1*) have been found in many analyzed non-  
107 syndromic pilomatricomas as well as in pilomatricomas associated with constitutive mismatch repair  
108 deficiency and in pilomatricomas [23,25-29]. Pilomatricomas have been described in a few  
109 patients with *APC*-mutated familial adenomatous polyposis (Gardener syndrome) but *APC*-mutations  
110 have not been reported in non-syndromic pilomatricoma [25,30]. The WNT/*APC*/ $\beta$ -catenin pathway

111 regulates hair follicle development, hair follicle cycling, and hair growth and  $\beta$ -catenin is strongly  
112 expressed in the proliferating matrix cells of pilomatricoma, both in catenin- $\beta$  mutated tumors and in  
113 pilomatricomas without a *CTNNB1* mutation [28]. Therefore, mutation of the *CTNNB1* most likely  
114 represents the tumor driving oncogenic event in pilomatricoma.

115 Besides benign pilomatricomas, patients with DM1 also have an enhanced risk of malignant tumors.  
116 The cancer risk is elevated by a factor of approx. 1.8 [31]; the most prevalent cancers affect skin,  
117 thyroid, ovary, and breast [15]. The relative cancer risk is elevated especially for testicular cancer in  
118 men, endometrial cancer and ovary cancer in women as well as brain cancer, thyroid cancer and Non-  
119 Hodgkin's lymphoma in both sexes [15,20,31,32].

120 Several hypotheses have been forwarded or can be formulated in order to explain the susceptibility to  
121 pilomatricoma and cancer in myotonic dystrophy patients:

122 1. *Direct effect of untranslated repetitive RNA on oncogene expression* – Following the gain-of-  
123 function-RNA hypothesis, Mueller and colleagues suggested in 2009 that the untranslated repetitive  
124 RNA directly enhances expression of  $\beta$ -catenin resulting in pilomatricomas as well as in various  
125 cancers which rely on activation of the WNT/APC/ $\beta$ -catenin pathway [15].

126 2. *Second mutation inducing genetic instability* – It has been suggested that the same cellular  
127 mechanism that allows for germline and somatic expansion of CTGn or CCTGn repeats in myotonic  
128 dystrophy patients type 1 and 2 could also lead to unchecked DNA repair errors [31]. This mechanism  
129 could be a hitherto not identified second mutation present in a subset of DM1 patients which would  
130 also explain that not all DM1 patients develop pilomatricomas or cancers.

131 3. *Effect of untranslated repetitive RNA on expression of genes involved in DNA proofreading or*  
132 *replication* – As an additional alternative, one may suggest that the untranslated repetitive RNA from  
133 the mutated *DMPK* gene interferes with the expression of genes involved in DNA proofreading and  
134 replication, thereby inducing both expansion of DNA repeats in the *DMPK* gene as well as mutations in  
135 cancer-driving genes.

136 4. *Direct interfering effect of untranslated repetitive RNA on molecular mechanisms involved in*  
137 *DNA proofreading or replication* – Alternatively to a second mutation, one may hypothesize that the  
138 untranslated repetitive RNA from the mutated *DMPK* gene directly interferes with molecular  
139 mechanisms involved in DNA proofreading or replication, for example by forming R-loops [8].

140 In order to gain insight into the molecular mechanisms which might be responsible for the occurrence  
141 of multiple pilomatricomas and cancers in patients with DM1, we sequenced the *CTNNB1* gene in five  
142 pilomatricomas and in one pilomatrical carcinoma from one patient with molecularly proven DM1 and  
143 further analyzed the tumors for microsatellite instability and for mutations in 161 cancer-associated  
144 genes.

145

146

## 147 **Results**

### 148 **Analysis of CTG repeat expansions**

149 The patient demonstrated one *DMPK* allele in the normal range with 5 +/- 2 repeats as well as an  
150 expanded *DMPK* allele with more than 400 CTG-repeats.

151

### 152 **Catenin-beta 1 gene sequencing**

153 We analyzed the Catenin beta 1 gene (*CTNNB1*) for mutations in six samples from four benign  
154 pilomatricomas, and in one sample of a pilomatrical carcinoma obtained from the patient (Fig 1A-E). In  
155 all samples we could detect mutations at typical hotspot regions of exon 3 of *CTNNB1* (Table 1).

156 Two pilomatricomas and one pilomatrical carcinoma demonstrated mutations which targeted codon 33  
157 (S33C, S33F, S33C). One pilomatricoma demonstrating a hitherto non described small duplication  
158 within codons 33 and 34 (c.99\_101dup, p.G34dup.). Another larger pilomatricoma which was  
159 microdissected at two areas demonstrated clonal heterogeneity as one area only demonstrated a  
160 mutation at codon 41 (T41I) while the other tissue area only displayed a mutation at codon 34 (G34V).

161 Table 1 summarizes the detected mutations and compares them to published mutations in the  
162 *CTNNB1* gene found in non-syndromic and in *PMS2*-mutation associated syndromic pilomatricomas  
163 as well as in sequenced pilomatrical carcinomas [22,25-29]. This overview shows that mutations of  
164 codon 33 and 37 of *CTNNB1* are represented at about the same frequency in non-syndromic

165 pilomatricoma. Entries in the COSMIC database covering more than 7000 *CTNNB1* mutations confirm  
166 that mutations at codons 33 and 37 are equally represented in human cancers and further show that  
167 the most mutated codons of *CTNNB1* are 41 and 45  
168 <https://cancer.sanger.ac.uk/cosmic/gene/analysis?ln=CTNNB1> . Only one other insertion mutation  
169 encompassing codon 34 is listed in the COSMIC database but it is different from the mutation detected  
170 in our patient and does not represent a DNA-duplication.

171 We checked whether the four observed base substitution mutations: T[C>T]T, T[C>G]T, T[C>A]C,  
172 A[C>T]C would be suggestive of one of the 30 published mutations signatures  
173 [<https://cancer.sanger.ac.uk/cosmic/signatures>]; however, the substitutions did not represent only one  
174 pattern but were found to predominate in patterns 2, 13, 24 and 12. Interestingly, these four patterns  
175 are assumed to display a transcriptional strand bias.

176

## 177 **Analysis of microsatellite instability and expression of mismatch repair** 178 **proteins**

179 As multiple pilomatricomas with *CTNNB1* mutations have been described in patients with *PMS2*  
180 germline mutations, we analyzed the stability of microsatellite DNAs BAT25, BAT26, D2S123, D5S354  
181 and D17S250 in two pilomatricomas of the patient (G34dup, T41I) and in the pilomatrical carcinoma.  
182 All tested microsatellites remained stable compared to lymphocyte DNA. The pilomatricoma with the  
183 duplication mutation was further analyzed at microsatellite markers BAT40, D10S197, NR21, NR22  
184 and NR24 without demonstration of microsatellite instability.

185 Expression of mismatch repair proteins was analyzed by immunohistochemistry staining proteins  
186 MLH1, MSH2, MSH6 and PMS2 in two pilomatricomas (G34dup, T41I) and a strong expression of all  
187 four proteins was detected in all samples. In the pilomatricomas, expression of mismatch repair  
188 proteins was restricted to the basaloid cells (Fig 1F).

189

## 190 **NGS-analysis of 161 cancer-related genes**

191 In addition, 161 cancer-related genes were screened for mutations using the OncoPrint  
192 Comprehensive Assay v3 with DNA and RNA from the pilomatricoma with the duplication mutation  
193 Glu34dup and from the pilomatricoma. NGS sequencing confirmed the presence of the  
194 individual *CTNNB1* mutations. NGS of genes *MLH1*, *MSH2*, *MSH6*, *PMS2* and *POLE* did neither  
195 reveal germline or somatic gene mutations in the patient's pilomatricoma (G34dup.), nor in the  
196 pilomatricoma or in blood lymphocytes. However, in both samples as well as in the blood DNA  
197 of the patient we could detect a pathogenic germline mutation in heterozygous state within the *ATM*  
198 gene (*ATM*: NM\_000051.3; c.8494C>T; p.Arg2832Cys). Besides known polymorphisms, no other  
199 pathogenic mutations could be found in the pilomatricoma, the pilomatricoma and the patient's  
200 blood DNA. CNV-analysis based on NGS-data did not reveal chromosomal instability in the  
201 pilomatricoma and in the pilomatricoma.

202

## 203 Discussion

204 Up to now it is not known which molecular mechanisms might be responsible for the occurrence of  
205 multiple pilomatricomas in patients with DM1. Likewise, the mechanism which might account for the  
206 enhanced cancer risk in DM1 is unknown. We report the first mutation analysis of the *CTNNB1* gene in  
207 multiple pilomatricomas and in one pilomatricoma obtained from a single patient with  
208 molecular proven DM1. The presence of somatically acquired mutations of exon 3 of the *CTNNB1*  
209 gene could be demonstrated. Moreover, five different *CTNNB1* mutations could be demonstrated in  
210 these tumors (S33C, S33F, G34V, T41I, G34dup) which evidences that mutations arose somatically  
211 and independently in each tumor. The results of *CTNNB* sequencing clearly rule out the hypothesis  
212 proposed by Mueller et al. which assumes a direct effect of untranslated repetitive RNA of the *DMPK*  
213 gene on *CTNNB1* oncogene expression without the need of a *CTNNB1* mutation [15].

214 The detection of different somatic *CTNNB* mutations in different pilomatricomas and in the pilomatricoma  
215 carcinoma as well as the fact that the patient developed 10 pilomatricomas and one pilomatricoma  
216 carcinoma within 4 years, strongly suggests that the patient displays a hypermutation phenotype. The  
217 distribution of mutations detected in the tumors of the patient seems to differ slightly from the mutation  
218 distribution displayed by non-syndromic pilomatricomas and pilomatricomas as no mutations



219 were found in codon 37; however, the number of sequenced tumors in the patient is too low for any  
220 statistical proof (Table 1).

221 The degree of genetic instability present in DM1 patients most likely varies considerably. Some DM1  
222 patients develop multiple pilomatricomas which suggests a greatly enhanced mutation rate at the  
223 *CTNNB* gene in these patients, but DM1 patients with pilomatricomas still seem to represent only a  
224 minority of all DM1 patients. This could suggest that an additional mutated gene or a polymorphism in  
225 one or several genes act as modifier of a putative hypermutation phenotype. Although one mutation  
226 detected in the patient's pilomatricoma involved a small duplication which might suggest that mismatch  
227 repair is reduced in the patient, analysis of microsatellite size within two pilomatricomas and the  
228 pilomatrical carcinoma of the patient did not reveal microsatellite instability. In addition, NGS of genes  
229 *MLH1*, *MSH2*, *MSH6*, *PMS2* and *POLE* did not reveal germline or somatic mutations in the patient's  
230 pilomatricoma (G34dup.), the pilomatrical carcinoma as well as in blood lymphocytes. Likewise,  
231 analysis of expression of DNA mismatch repair proteins did not reveal a defect within the MMR  
232 pathway in the studied pilomatricomas.

233 In order to detect additional gene mutations which might modify genetic instability we performed NGS  
234 analysis on 161 cancer-related genes with tumor material of the pilomatricoma with the G34  
235 duplication and of the pilomatrical carcinoma and compared the result with the patient's blood.

236 The only additional mutation which could be detected by NGS was the heterozygous germline  
237 mutation c.8494C>T; p.(Arg2832Cys) within the ataxia telangiectasia mutated gene (*ATM*). Biallelic  
238 inactivation of *ATM* induces Ataxia telangiectasia (A-T) which is an autosomal recessive disorder with  
239 cerebellar degeneration, telangiectasia, immunodeficiency and cancer susceptibility [35]. A-T-cells  
240 display radiation sensitivity due to a defect in repair of DNA double strand breaks. Cancer spectrum of  
241 A-T does not overlap with cancers found in DM1 patients. Moreover, the wild type allele of *ATM* was  
242 retained in the pilomatricoma as well as in the pilomatrical carcinoma which suggests that biallelic  
243 functional inactivation of *ATM* did not play a role in the development of pilomatricoma and pilomatrical  
244 carcinoma. Nevertheless, the *ATM* missense mutation c.8494C>T; p.(Arg2832Cys) has been  
245 associated with an increased cancer risk even in heterozygous carriers [35], therefore a disease  
246 modifying role in DM1-associated cancer susceptibility might not be ruled out completely and other  
247 patients with DM1 and pilomatricomas should be screened for defects in cancer-driving genes.

248 Although the molecular mechanisms responsible for the hypermutation phenotype remain unexplained  
249 in the described patient, the multiple occurrence of pilomatricomas with individual somatic *CTNNB1*  
250 mutations suggests some characteristics of the putative genetic defect:

251 The *CTNNB1* gene as well as the hair matrix cells seem to be preferentially targeted by the unknown  
252 genetic defect as pilomatricoma is a rare benign neoplasm and other potential *CTNNB1* driven  
253 neoplasms do not seem to be more frequent in DM1 patients with the exception of endometrial cancer.  
254 According to the COSMIC database, *CTNNB1* mutations have been detected at more than 10%  
255 frequency in neoplasms of pituitary (37%), soft tissue (36%), liver (22%), endometrium (18%), adrenal  
256 gland 13% and small intestine 12% (only entries with more than 100 sequenced samples):

257 <https://cancer.sanger.ac.uk/cosmic/gene/analysis?ln=CTNNB1#tissue>. Tissue distribution of *DMPK*-  
258 RNA-expression might represent a modifying factor as *DMPK*-RNA seems to be present in cycling  
259 keratinocytes, in hair follicles as well as in endometrial tissue [36] (see also The Human Protein Atlas,  
260 <https://www.proteinatlas.org/ENSG00000104936-DMPK/tissue>). Co-translation of the mutated *DMPK*  
261 gene and the *CTNNB1* gene in cycling hair follicles might be responsible for tissue and gene  
262 specificity and could be an explanation for the putative mutation signatures detected in the patient's  
263 tumor specimens which suggest a transcriptional mutational bias. Co-translation of *DMPK* and  
264 *CTNNB1* resulting in a defect of translation coupled DNA repair at the *CTNNB1* gene could further  
265 provide an explanation why no additional mutation could be detected within the other 160 cancer-  
266 related genes which were screened by NGS even though the patient obviously displays a  
267 hypermutation phenotype. Hypermutability by toxic *DMPK* gene-derived RNA might be induced  
268 through defective splicing of mRNA of genes with proofreading function and of genes implicated in  
269 DNA replication. Alternatively, hypermutability might result from a direct interfering effect of toxic RNA  
270 on proofreading or replication. Figure 2 exemplifies these hypotheses.

271 The observation that multiple pilomatricomas with *CTNNB1* mutations have been observed in patients  
272 with constitutive mismatch repair deficiency (CMMR-D) associated with *PMS2* germline mutations [22]  
273 and that *CTNNB1* mutations are frequent in colon cancers of HNPCC patients with *MLH1* or *MSH2*  
274 germline mutations suggested that the DNA mismatch repair mechanisms might play a role in  
275 *CTNNB1* mutation susceptibility. Interestingly, analysis of CMMR-D-associated pilomatricomas did not  
276 reveal microsatellite instability with markers BAT-26, BAT-25, BAT-40, D2S123, D5S346, D17S250,  
277 TGFbRII, D17S787, D18S58 and D18S69 despite mutations of *PMS2* [22]. This might indicate that

278 lack of microsatellite instability in pilomatricomas may not rule out a causative role of DNA mismatch  
279 repair in the enhanced mutation rate of the *CTNNB1* gene. Most importantly, while defects of DNA  
280 mismatch repair proteins lead to microsatellite instability, it seems that the expansion of trinucleotide  
281 repeats is linked to overexpression of the mismatch repair proteins MSH2, MSH3 or PMS2 [7,9,36].  
282 DNA mismatch repair proteins do not only play a role in post replication DNA mismatch repair but also  
283 seem to be implicated in double strand break repair, transcription-coupled repair and nucleotide  
284 excision repair [37]. Alterations of the DNA mismatch repair proteins might therefore still be  
285 responsible for the observed enhanced mutation rate of the *CTNNB1* gene in the pilomatricomas of  
286 the DM1 patient. A BRCA1-associated genome surveillance complex (BASC) has been hypothesized,  
287 which contains BRCA1, MSH2, MSH6, MLH1, ATM, BLM, PMS2 and the RAD50-MRE11-NBS1  
288 protein [38]. The presence of ATM in BASC could hint to a link between the enhanced mutation rate of  
289 *CTNNB1* in the analyzed pilomatricomas and the detected *ATM* germline mutation.

290 In conclusion, molecular analysis of four pilomatricomas and one pilomatrical carcinoma in a patient  
291 with myotonic dystrophy type 1 demonstrated that the patient displayed hypermutability within his hair  
292 matrix cells targeting the catenin- $\beta$  gene which suggests a tissue and gene restricted hypermutation  
293 phenotype associated with DM1. Hereby we could disregard the hypothesis first proposed in 2009 that  
294 the untranslated repetitive RNA of the expanded *DMPK* gene directly enhances expression of  $\beta$ -  
295 catenin resulting in pilomatricomas as well as in various cancers which rely on activation of the  
296 WNT/APC/ $\beta$ -catenin pathway [15]. More molecular research on DM1 cancer predisposition will have to  
297 be performed in order to identify the mechanisms responsible for putative hypermutability in DM1  
298 patients.

299

## 300 **Materials and methods**

### 301 **Ethics statement**

302 The University ethics committee (Ethik-Kommission an der Medizinischen Fakultät der RWTH Aachen)  
303 approved this research (EK-314-19, written consent).

304 Genetic analyses were performed with written consent of the patient and germline mutation analysis  
305 was undertaken after genetic counseling as required by German law. The patient gave written  
306 consent for publication.

307

### 308 **Patient's characteristics**

309 The male patient was 39-year-old when he first presented with two pilomatricomas located on the  
310 scalp and on the left elbow. Until the age of 43 he developed 8 additional pilomatricomas located on  
311 the scalp as well as one pilomatrical carcinoma of the scalp. The clinical diagnosis of myotonic  
312 dystrophy was first assumed at the age of 27 when he demonstrated muscle myotonia, sleep apnea,  
313 bilateral ptosis, mild cataract and characteristic changes of the electromyogram. Besides  
314 pilomatricomas, dermatologic examination of the patient revealed multiple (>50) melanocytic nevi as  
315 previously described in myotonic dystrophy patients [33], frontal baldness as well as one neurofibroma  
316 located on the chest. Radiologic staging for pilomatrical carcinoma revealed a 4 cm large left-sided  
317 thyroid nodule which was benign according to fine needle biopsy. The molecular diagnosis of DM1  
318 was confirmed at that time. No symptoms of DM1 were present in both parents, in his brother and  
319 sister, as well as in his sister's three children. A molecular analysis of the *DMPK* gene was not  
320 performed in the patient's relatives. His grandmother died from an unknown cancer, an uncle died at  
321 the age of 63 from prostate cancer while another uncle died from colon cancer at the age of 50.

322

### 323 **Analysis of CTG repeat expansions**

324 CTG repeat expansion within the *DMPK* gene was determined by PCR and Southern blot analysis as  
325 previously described [3,4].

326

### 327 **Analysis of catenin- $\beta$ gene mutations**

328 Five pilomatricomas and one pilomatrical carcinoma were analyzed. Tumor tissue was manually  
329 microdissected from the slides and FFPE-DNA and RNA was isolated with the Maxwell system

330 (Promega) according the manufacturer's protocol. DNA from lymphocytes was isolated by salting out  
331 method.

332 Tumor cell fraction was at least >20% in all cases. All cases were sequenced by sanger sequencing  
333 after amplification of exon 3 of the *CTNNB1* gene by PCR (reference genome NCBI, hg19/NM\_  
334 001904.3) [34]. Sequence analysis was performed with JSI SeqPilot Software (SeqPatient module).

335

### 336 **Next generation sequencing analysis of pilomatricoma and pilomatrical** 337 **carcinoma**

338 Additionally, next generation sequencing (NGS) was performed with the Ampliseq Comprehensive  
339 Assay v3 for Illumina with DNA and RNA from two patients' tumor samples (pilomatrical carcinoma,  
340 tumor cell fraction >80%, one pilomatricoma, tumor cell fraction >40%) and blood according to the  
341 manufacturer's instructions (reference genome NCBI, hg19). Libraries were sequenced on the  
342 NextSeq or MiSeq platform (Illumina) respectively. Bam files were generated with the DNA and RNA  
343 Amplicon Module (Illumina). Fusion calling and expression analysis of the RNA was also performed  
344 with the RNA Amplicon module, DNA variant analysis was performed with the JSI SeqPilot Software  
345 (SeqNext module), variants with an allele frequency >10% were further analyzed. Variants with an  
346 allele frequency of >1% in the normal population according to gnomAD  
347 (<https://gnomad.broadinstitute.org/>) were considered benign polymorphisms. Copy number variation  
348 (CNV) analysis was performed with an in-house algorithm (manuscript in preparation).

349

### 350 **Analysis of microsatellite instability and expression of mismatch repair** 351 **proteins**

352 Extracted DNA for NGS analysis was also used to perform MSI testing. DNA tumor samples and  
353 corresponding normal tissue were PCR-amplified with the Bethesda marker panel (BAT25, BAT26,  
354 D2S123, D5S354 and D17S250) and in one sample also with markers BAT40, D10S197, NR21, NR22  
355 and NR24 in a multiplex-PCR with fluorescence-tagged primers. The fragment sizes were displayed

356 by co-electrophoresis using the Genetic Analyzer 3500 capillary sequencer (ThermoFisher). Fragment  
357 length analysis was performed using Genemapper Software 5 (ThermoFisher).

358

### 359 **Analysis of expression of DNA mismatch repair proteins**

360 Immunohistochemical staining of DNA mismatch repair proteins in tumor tissue was performed as  
361 follows: 3-4  $\mu\text{m}$  slides were cut and stained for MLH1 (Monoclonal Mouse Anti-Human; Clone ES05,  
362 dilution 1 : 10, Dako), MSH2 (Monoclonal Mouse Anti-Human; Clone G219-1129, dilution 1 : 200, BD  
363 Biosciences) MSH6 (Monoclonal Rabbit Anti-Human; Clone EP49, dilution 1 : 1000 Dako) PMS2  
364 (Monoclonal Mouse Anti-Human; Clone A 16-4, dilution 1 : 100, BD Biosciences) to assess the  
365 reactivity in the nuclei of tumor cells. Immunostains were developed according to an antigen retrieval  
366 treatment (in buffer at pH 6.1 for MLH1, MSH2 and PMS2 and at pH 9 for MSH6) using a detection  
367 system suitable for the Dako Autostainer Link 48 (EnVision FLEX, Dako).

368

369

370

### 371 **Acknowledgements**

372 We would like to thank Inge Losen, Department of Dermatology, RWTH Aachen University, for her  
373 technical support.

374

375

## 376   **References**

377

- 378           1.       Mahadevan M, Tsilfidis C, Sabourin L, Shutler G, Amemiya C, Jansen G, et al.  
379                    Myotonic dystrophy mutation: an unstable CTG repeat in the 3'untranslated region of  
380                    the gene. *Science*. 1992;255(5049):1253–5.
- 381           2.       Aslanidis C, Jansen G, Amemiya C, Shutler G, Mahadevan M, Tsilfidis C et al.  
382                    Cloning of the essential myotonic dystrophy region and mapping of the putative  
383                    defect. *Nature*. 1992;355(6360):548–51.
- 384           3.       Brook JD, McCurrach ME, Harley HG, Buckler AJ, Church D, Aburatani H et al.  
385                    Molecular basis of myotonic dystrophy: expansion of a trinucleotide (CTG) repeat at  
386                    the 3' end of a transcript encoding a protein kinase family member. *Cell*.  
387                    1992;68(4):799-808.
- 388           4.       Shelbourne P, Winqvist R, Kunert E, Davies J, Leisti J, Thiele H et al. Unstable DNA  
389                    may be responsible for the incomplete penetrance of the myotonic dystrophy  
390                    phenotype. *Hum Mol Genet*. 1992;1(7):467–73.
- 391           5.       Kumar A, Agarwal S, Agarwal D, Phadke SR. Myotonic dystrophy type 1 (DM1): a  
392                    triplet repeat expansion disorder. *Gene*. 2013;522(2):226-30.
- 393           6.       Chong-Nguyen C, Wahbi K, Algalarrondo V, Bécane HM, Radvanyi-Hoffman H,  
394                    Arnaud P, et al. Association between mutation size and cardiac involvement in  
395                    myotonic dystrophy type 1: An analysis of the DM1-heart registry. *Circ Cardiovasc*  
396                    *Genet*. 2017;10(3). pii: e001526.
- 397           7.       van den Broek WJ, Nelen MR, Wansink DG, Coerwinkel MM, te Riele H, Groenen PJ,  
398                    et al. Somatic expansion behaviour of the (CTG)<sub>n</sub> repeat in myotonic dystrophy  
399                    knock-in mice is differentially affected by Msh3 and Msh6 mismatch-repair proteins.  
400                    *Hum Mol Genet*. 2002;11(2):191-8.
- 401           8.       Reddy K, Schmidt MH, Geist JM, Thakkar NP, Panigrahi GB, Wang YH, et al.  
402                    Processing of double-R-loops in (CAG)<sub>n</sub>·(CTG)<sub>n</sub> and C9orf72 (GGGGCC)<sub>n</sub>·(GGCCCC)<sub>n</sub>  
403                    repeats causes instability. *Nucleic Acids Res*. 2014;42(16):10473-87.

- 404 9. Guo J, Gu L, Leffak M, Li GM. MutS $\beta$  promotes trinucleotide repeat expansion by  
405 recruiting DNA polymerase  $\beta$  to nascent (CAG) $_n$  or (CTG) $_n$  hairpins for error-prone  
406 DNA synthesis. *Cell Res.* 2016;26(7):775-86.
- 407 10. Lu X, Timchenko NA, Timchenko LT. Cardiac elav-type RNA-binding protein (ETR-3)  
408 binds to RNA CUG repeats expanded in myotonic dystrophy. *Hum Mol Genet.*  
409 1999;8(1):53-60.
- 410 11. Savkur RS, Philips AV, Cooper TA. Aberrant regulation of insulin receptor alternative  
411 splicing is associated with insulin resistance in myotonic dystrophy. *Nat Genet.*  
412 2001;29(1):40-7.
- 413 12. Sergeant N, Sablonnière B, Schraen-Maschke S, Ghestem A, Maurage CA, Wattez A  
414 et al. Dysregulation of human brain microtubule-associated tau mRNA maturation in  
415 myotonic dystrophy type 1. *Hum Mol Genet.* 2001;10(19):2143-55.
- 416 13. Cantwell AR Jr, Reed WB. Myotonia atrophica and multiple calcifying epithelioma of  
417 Malherbe. *Acta Derm Venerol.* 1965;45(5):387-90.
- 418 14. Sherrod QJ, Chiu MW, Gutierrez M. Multiple pilomatricomas: cutaneous marker for  
419 myotonic dystrophy. *Dermatol Online J.* 2008;14(7):22.
- 420 15. Mueller CM, Hilbert JE, Martens W, Thornton CA, Moxley RT 3rd, Greene MH.  
421 Hypothesis: neoplasms in myotonic dystrophy. *Cancer Causes Control.*  
422 2009;20(10):2009-20.
- 423 16. Lan MY, Lan MC, Ho CY, Li WY, Lin CZ. Pilomatricoma of the head and neck: a  
424 retrospective review of 179 cases. *Arch Otolaryngol Head Neck Surg.*  
425 2003;129(12):1327-30.
- 426 17. Hernández-Núñez A, Nájera Botello L, Romero Maté A, Martínez-Sánchez C, Utrera  
427 Busquets M, Calderón Komáromy A, et al. Retrospective study of pilomatricoma: 261  
428 tumors in 239 patients. *Actas Dermosifiliogr.* 2014;105(7):699-705.
- 429 18. Guinot-Moya R, Valmaseda-Castellon E, Berini-Aytes L, Gay-Escoda C.  
430 Pilomatrixoma. Review of 205 cases. *Med Oral Patol Oral Cir Bucal.*  
431 2011;16(4):e552-5.
- 432 19. Gadalla SM, Hilbert JE, Martens WB, Givens S, Moxley RT 3rd, Greene MH.  
433 Pigmentation phenotype, photosensitivity and skin neoplasms in patients with  
434 myotonic dystrophy. *Eur J Neurol.* 2017;24(5):713-18.



- 435           20.    Bianchi ML, Leoncini E, Masciullo M, Modoni A, Gadalla SM, Massa R et al.  
436                    Increased risk of tumor in DM1 is not related to exposure to common lifestyle risk  
437                    factors. *J Neurol*. 2016;263(3):492-8.
- 438           21.    Marcoval J, Olivé M, Bonfill-Ortí M, Martínez-Molina L, Talavera-Belmonte A.  
439                    Cutaneous neoplasms in myotonic dystrophy type 1. *Dermatology*. 2016;232(6):700-  
440                    3.
- 441           22.    Alsaggaf R, St George DMM, Zhan M, Pfeiffer RM, Wang Y, Anderson LA, Liu Z,  
442                    Koshiol J, Bauer AJ, Wagner KR, Greene MH, Amr S, Gadalla SM. Benign tumors in  
443                    myotonic dystrophy type I target disease-related cancer sites. *Ann Clin Transl Neurol*.  
444                    2019;6(8):1510-18.
- 445           23.    Chmara M, Wernstedt A, Wasag B, Peeters H, Renard M, Beert E et al. Multiple  
446                    pilomatricomas with somatic CTNNB1 mutations in children with constitutive  
447                    mismatch repair deficiency. *Genes Chromosomes Cancer*. 2013;52(7):656-64.
- 448           24.    Hubbard VG, Whittaker SJ. Multiple familial pilomatricomas: an unusual case. *J*  
449                    *Cutan Pathol*. 2004;31(3):281-3.
- 450           25.    Chan EF, Gat U, McNiff JM, Fuchs E. A common human skin tumour is caused by  
451                    activating mutations in beta-catenin. *Nat Genet*. 1999;21(4):410-3.
- 452           26.    Ha SJ, Kim JS, Seo EJ, Lee KH, Lee HJ, Kim JW. Low frequency of beta-catenin  
453                    gene mutations in pilomatricoma. *Acta Derm Venereol*. 2002;82(6):428-31.
- 454           27.    Xia J, Urabe K, Moroi Y, Koga T, Duan H, Li Y, et al. beta-Catenin mutation and its  
455                    nuclear localization are confirmed to be frequent causes of Wnt signaling pathway  
456                    activation in pilomatricomas. *J Dermatol Sci*. 2006;41(1):67-75.
- 457           28.    Moreno-Bueno G, Gamallo C, Pérez-Gallego L, Contreras F, Palacios J. beta-catenin  
458                    expression in pilomatricomas. Relationship with beta-catenin gene mutations and  
459                    comparison with beta-catenin expression in normal hair follicles. *Br J Dermatol*.  
460                    2001;145(4):576-81.
- 461           29.    Lazar AJ, Calonje E, Grayson W, Dei Tos AP, Mihm MC Jr, Redston M et al.  
462                    Pilomatric carcinomas contain mutations in CTNNB1, the gene encoding beta-  
463                    catenin. *J Cutan Pathol*. 2005;32(2):148-57.

- 464 30. Trufant J, Kurz W, Frankel A, Muthusamy V, McKinnon W, Greenblatt M, et al.  
465 Familial multiple pilomatrixomas as a presentation of attenuated adenomatosis  
466 polyposis coli. *J Cutan Pathol*. 2012;39(4):440-3.
- 467 31. Fernández-Torrón R, García-Puga M, Emparanza JI, Maneiro M, Cobo AM, Poza JJ  
468 et al. Cancer risk in DM1 is sex-related and linked to miRNA-200/141 downregulation.  
469 *Neurology*. 2016;87(12):1250-7.
- 470 32. Abbott D, Johnson NE, Cannon-Albright LA. A population-based survey of risk for  
471 cancer in individuals diagnosed with myotonic dystrophy. *Muscle Nerve*.  
472 2016;54(4):783-5.
- 473 33. Zampetti A, Silvestri G, Manco S, Khamis K, Masciullo M, Bianchi ML, et al.  
474 Dysplastic nevi, cutaneous melanoma, and other skin neoplasms in patients with  
475 myotonic dystrophy type 1: a cross-sectional study. *J Am Acad Dermatol*.  
476 2015;72(1):85-91.
- 477 34. Nollet F, Berx G, Molemans F, van Roy F. Genomic organization of the human beta-  
478 catenin gene (CTNNB1). *Genomics*. 1996;32(3):413-24.
- 479 35. Mitui M, Nahas SA, Du LT, Yang Z, Lai CH, Nakamura K, et al. Functional and  
480 computational assessment of missense variants in the ataxia-telangiectasia mutated  
481 (ATM) gene: mutations with increased cancer risk. *Hum Mutat*. 2009;30(1):12-21.
- 482 36. Sarkar PS, Han J, Reddy S. In situ hybridization analysis of Dmpk mRNA in adult  
483 mouse tissues. *Neuromuscul Disord*. 2004;14(8-9):497-506.
- 484 37. Lai Y, Budworth H, Beaver JM, Chan NL, Zhang Z, McMurray CT, Liu Y. Crosstalk  
485 between MSH2-MSH3 and pol $\beta$  promotes trinucleotide repeat expansion during base  
486 excision repair. *Nat Commun*. 2016;7:12465.
- 487 38. Wang Y, Cortez D, Yazdi P, Neff N, Elledge SJ, Qin J. BASC, a super complex of  
488 BRCA1-associated proteins involved in the recognition and repair of aberrant DNA  
489 structures. *Genes Dev*. 2000;14(8):927-39.

490

491

492 **Tables**

493 **Table 1. CTNNB1-mutations detected in four pilomatricomas (PM) and one pilomatrical**  
 494 **carcinoma (PMC) of the described DM1-patient and overview of published mutations in non-**  
 495 **syndromic and syndromic PM as well as in PMC.**

| Detected mutation |            | Non-syndromic PM [25-29] | CMMR-D-syndrome PM [22] | PMC [29] | DM1-case (PM and PMC) |
|-------------------|------------|--------------------------|-------------------------|----------|-----------------------|
| protein           | Nucleotide |                          |                         |          |                       |
| D32Y              | GAC>TAC    | 7                        | 1                       | 1        |                       |
| D32G              | GAC>GGC    | 1                        |                         |          |                       |
| D32V              | GAC>GTC    | 1                        |                         |          |                       |
| D32Q              | GAC>CAG    | 1                        |                         |          |                       |
| S33C              | TCT>TGT    | 2                        |                         |          | 1 PM,<br>1 PMC        |
| S33F              | TCT>TTT    | 10                       |                         | 3        | 1 PM                  |
| S33Y              | TCT>TAT    | 2                        |                         |          |                       |
| S33P              | TCT>CCT    |                          | 2                       |          |                       |
| G34R              | GGA>AGA    | 1                        |                         |          |                       |
| G34E              | GGA>GAA    | 3                        |                         | 1        |                       |
| G34V              | GGA>GTA    |                          |                         | 1        | 1 PM*                 |

|              |                                        |    |   |    |       |
|--------------|----------------------------------------|----|---|----|-------|
| G34dup       | c99._101dup<br>(TGGdup)<br><br>ACC>ATC |    |   |    | 1 PM  |
| S37C         | TCT>TGT                                | 3  |   | 1  |       |
| S37F         | TCT>TTT                                | 3  |   | 2  |       |
| S37Y         | TCT>TAT                                | 3  |   |    |       |
| T41I         | ACC>ATC                                | 2  | 3 |    | 1 PM* |
| T41A         | ACC>GCC                                | 1  | 3 |    |       |
| L46L         | CTG>CTA                                |    |   | 1  |       |
| S47N         | AGT>AAT                                | 1  |   |    |       |
| G48D         | GGT>GAT                                | 1  |   |    |       |
| <b>Total</b> |                                        | 42 | 9 | 10 | 6(5)* |

496 \* One large pilomatricoma demonstrated biclonal mutations

497

498

499 **Figure legends:**

500

501 **Fig. 1. *CTNNB1* sequencing**

502 Mutations: A > S33C, B > S33F, C > G34dup., D > G34V, E > T41I. F: Immunohistochemistry  
503 of MSH6 expression restricted to matrix cells of the pilomatricoma p.(G34dup).

504

505 **Fig. 2. Two hypotheses on interaction of toxic RNA from mutated *DMPK* gene.**

506 I: Toxic RNA interferes with splicing of RNA from genes with proofreading function. Defective  
507 proteins enhance mutation rate during transcription and replication of *CTNNB1*. II: Toxic RNA  
508 sequesters proteins involved in proofreading (IIa) or interferes directly at the site of transcription  
509 or replication of *CTNNB1* (IIb) and thereby enhances mutation rate during transcription and  
510 replication.

bioRxiv preprint doi: <https://doi.org/10.1101/844647>; this version posted November 15, 2019. The copyright holder for this preprint (which was not certified by peer review) is the author/funder, who has granted bioRxiv a license to display the preprint in perpetuity. It is made available under aCC-BY 4.0 International license.

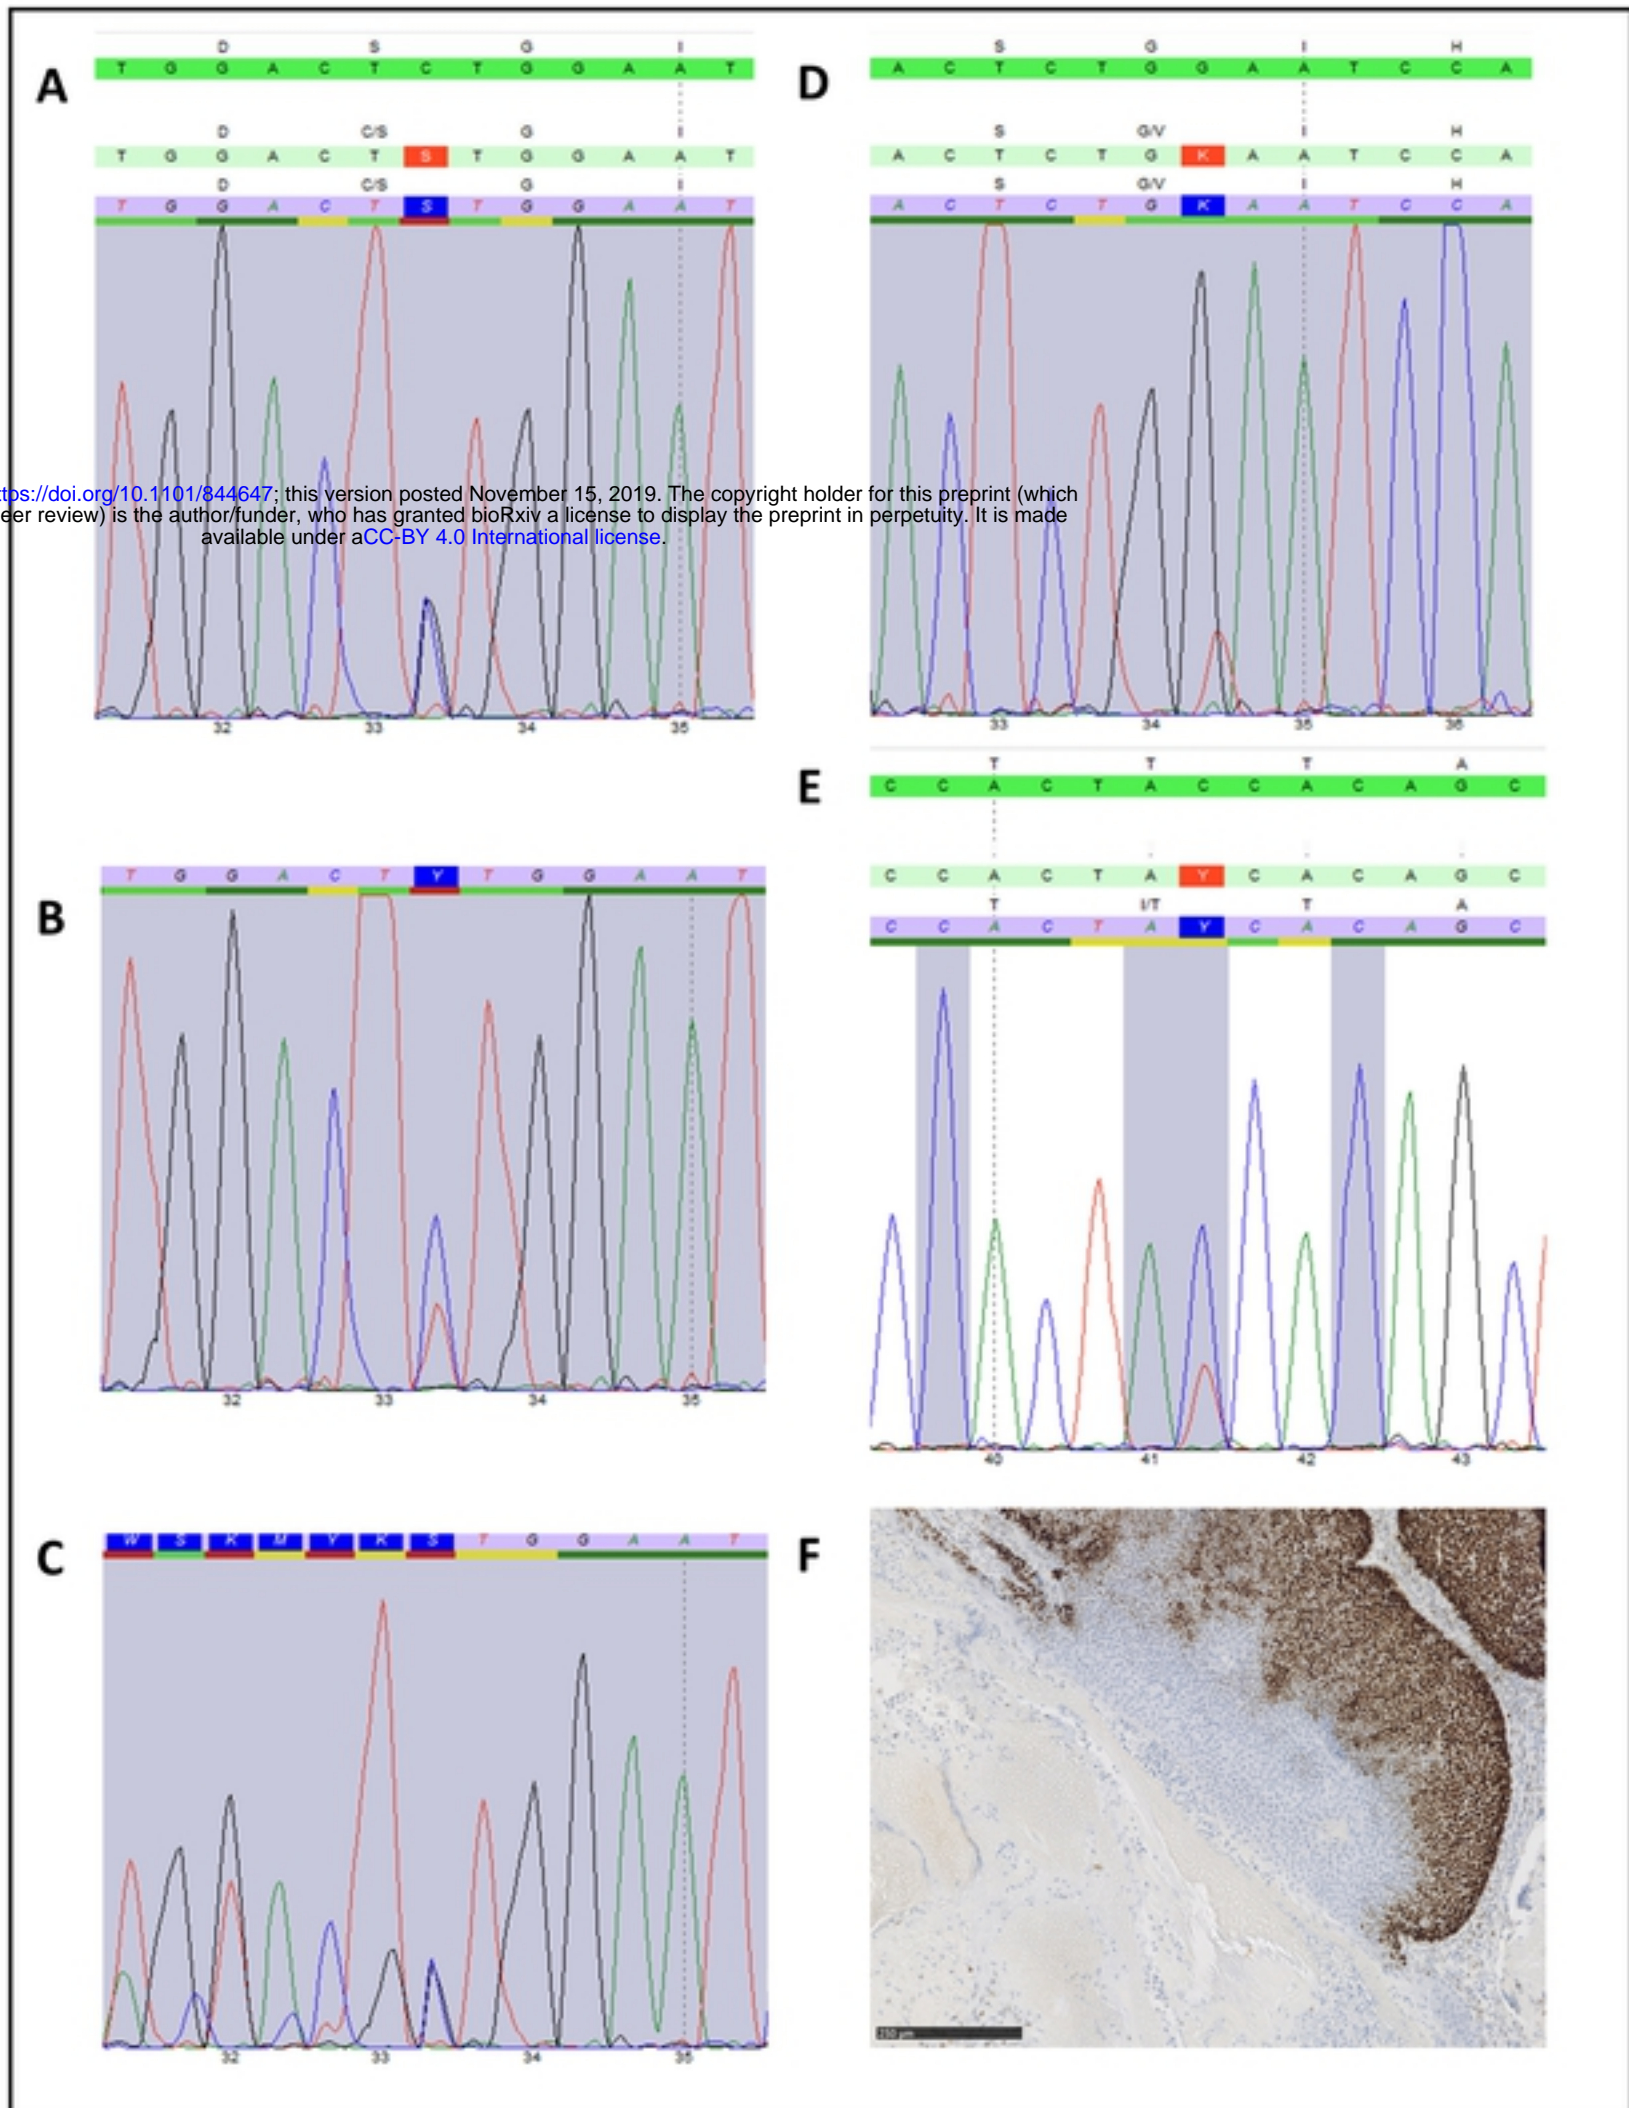

Figure 1

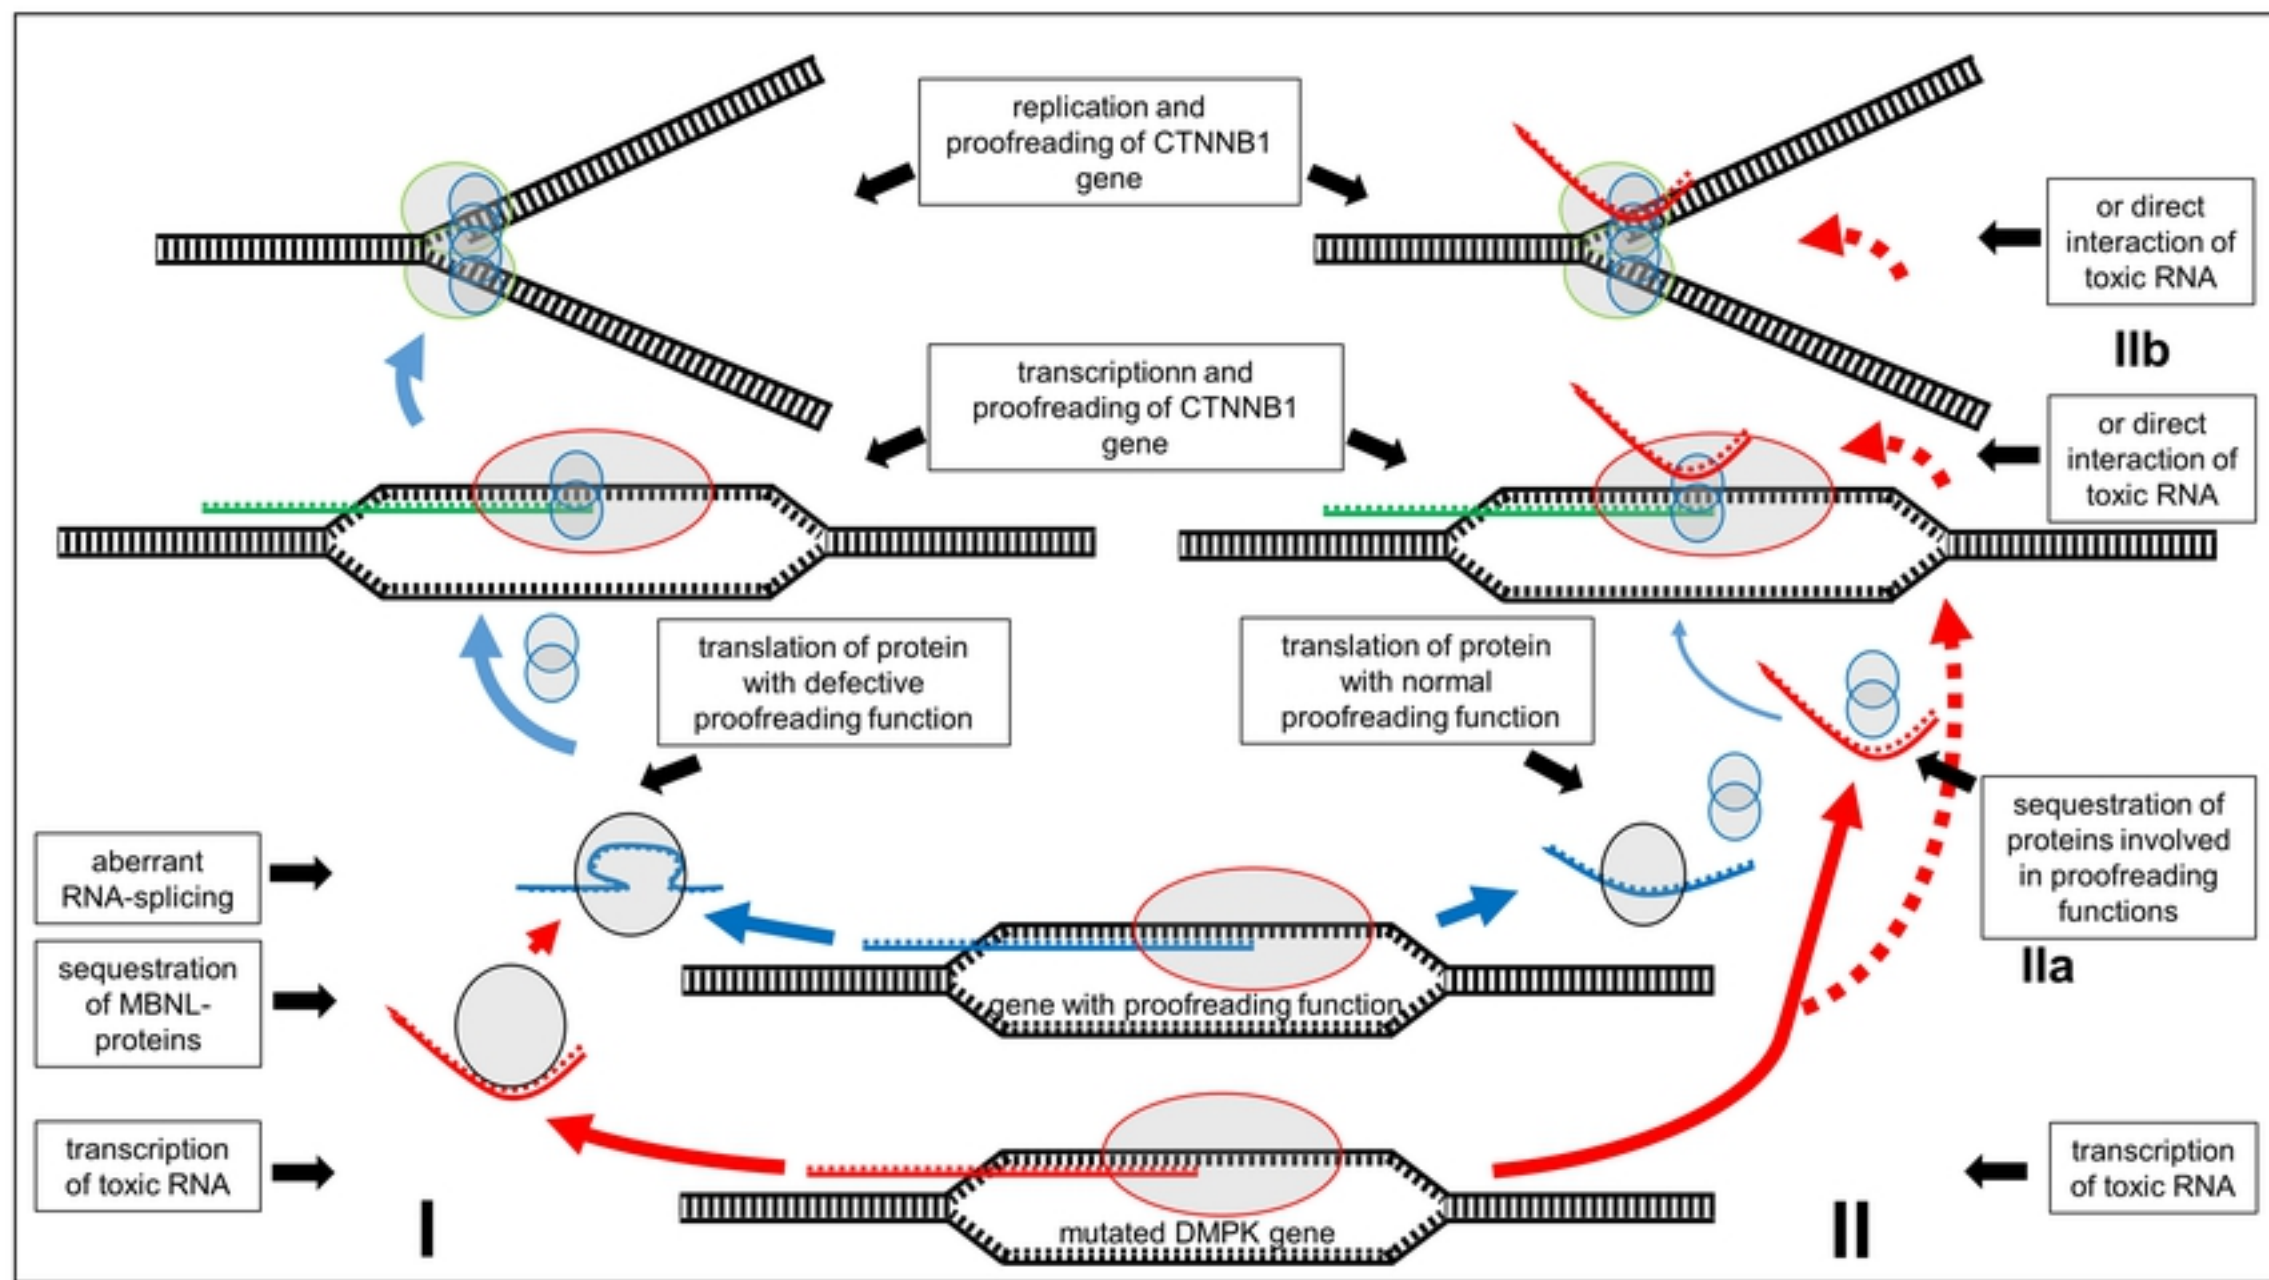

Figure 2
